# Supplementary material for: Genome-wide analysis of the strigolactone biosynthetic and signaling genes in grapevine and their response to salt and drought stresses
Source: PeerJ. 2022 Jun 10;10:e13551. doi: 10.7717/peerj.13551 (PMC9196262; doi:10.7717/peerj.13551)
Supplement: Supplemental Information 7 [file peerj-10-13551-s007.xlsx]

## Sheet: Sheet1
200mM NaCl										200mM mannitol
leaves					roots					leaves					roots
'0, 3, 6, 12'' represent the control grapes										"G" represent mannitol simulated drought treatment
CCD8	0	1	0.367212		CCD8	0	1	0.0462813		CCD8	0	1	0.191947		CDD8	0	1	0.0462813
	3	0.709682	0.502513			3	0.174207	0.0165237			3	0.709682	0.502513			3	0.174207	0.0165237
	NaCl 3h	1.40908	0.517432			NaCl 3h	0.433912	0.0618528			G3	2.3834	0.219159			G3	0.116245	0.00903671
	6	2.48983	0.269886			6	0.17271	0.00653031			6	2.48983	0.269886			6	0.17271	0.00653031
	NaCl 6h	3.50837	0.789372			NaCl 6h	0.280039	0.11841			G6	5.2276	1.00342			G6	0.578029	0.130327
	12	2.12339	0.611043			12	0.100697	0.0227039			12	2.12339	0.611043			12	0.100697	0.0227039
	NaCl 12h	1.50693	0.433646			NaCl 12h	0.0682313	0.00173488			G12	1.84889	0.441108			G12	0.0415038	0.00521843
D27	0	1	0.488083		D27	0	1	0.0650875		D14	0	1	0.0515154		D14	0	1	0.0457794
	3	1.56983	0.290125			3	0.255506	0.00967927			3	0.711801	0.0341332			3	0.544697	0.0200702
	NaCl 3h	2.45533	0.344549			NaCl 3h	1.68026	0.337375			G3	0.944398	0.048651			G3	0.591813	0.0142525
	6	1.23018	0.187069			6	0.138112	0.00771484			6	0.800542	0.359017			6	1.08421	0.067721
	NaCl 6h	5.18234	1.52232			NaCl 6h	1.57613	0.0553398			G6	1.10714	0.099302			G6	0.74757	0.0284745
	12	1.00203	0.379931			12	0.0481094	0.00474813			12	1.29711	0.227148			12	0.403317	0.0237231
	NaCl 12h	6.59922	1.39422			NaCl 12h	0.745199	0.0438408			G12	1.05888	0.0663428			G12	0.439956	0.0280104
MAX1	0	1	0.68139		MAX1	0	1	0.0953112		D27	0	1	0.322885		D27	0	1	0.0650875
	3	0.463414	0.154754			3	0.217697	0.0265239			3	1.56983	0.290125			3	0.255506	0.00967927
	NaCl 3h	1.03899	0.529916			NaCl 3h	0.237128	0.0250355			G3	1.28855	0.416053			G3	0.944449	0.0588666
	6	1.10736	0.564784			6	0.284101	0.0620809			6	1.23018	0.187069			6	0.138112	0.00771484
	NaCl 6h	0.938263	0.229146			NaCl 6h	0.658504	0.128771			G6	4.56966	1.45265			G6	0.194582	0.0203648
	12	0.904764	0.592717			12	0.279167	0.042346			12	1.00203	0.379931			12	0.0481094	0.00474813
	NaCl 12h	2.14373	0.742585			NaCl 12h	0.258265	0.0293917			G12	0.776067	0.393257			G12	0.178425	0.0190397
D14	0	1	0.255045		D14	0	1	0.0457794		D53	0	1	0.0265182		D53	0	1	0.0787973
	3	0.711801	0.0341332			3	0.544697	0.0200702			3	0.906011	0.0487543			3	0.715468	0.0339155
	NaCl 3h	1.98082	0.109116			NaCl 3h	1.33667	0.0655837			G3	0.485389	0.0301549			G3	0.999431	0.0772841
	6	0.800542	0.359017			6	1.08421	0.067721			6	0.837892	0.184979			6	0.932961	0.0537055
	NaCl 6h	2.69569	0.64784			NaCl 6h	1.22163	0.0455587			G6	0.850846	0.0482426			G6	2.42421	0.105853
	12	1.29711	0.227148			12	0.403317	0.0237231			12	0.593877	0.319424			12	1.00364	0.0412751
	NaCl 12h	1.67937	0.296693			NaCl 12h	0.965692	0.160051			G12	1.27061	0.168533			G12	0.66919	0.0249549
D53	0	1	0.0748317		D53	0	1	0.0787973		LBO	0	1	0.0365245		LBO	0	1	0.047587
	3	0.906011	0.0487543			3	0.715468	0.0339155			3	0.778858	0.0394711			3	0.360186	0.0155756
	NaCl 3h	0.747429	0.145302			NaCl 3h	1.67447	0.472172			G3	0.465846	0.0315954			G3	0.321614	0.0129037
	6	0.837892	0.184979			6	0.932961	0.0537055			6	0.836863	0.2879			6	0.0784509	0.00345329
	NaCl 6h	3.41296	0.183658			NaCl 6h	2.65851	0.402108			G6	0.733164	0.112351			G6	0.0549066	0.014289
	12	0.593877	0.319424			12	1.00364	0.0412751			12	1.34041	0.223478			12	0.0282569	0.00124383
	NaCl 12h	2.32719	0.44412			NaCl 12h	1.70388	0.302566			G12	1.16531	0.0729192			G12	0.0631129	0.0033706
MAX2	0	1	0.26782		MAX2	0	1	0.043292
	3	0.987065	0.183427			3	1.87765	0.0527686		MAX1	0	1	0.279385		MAX1	0	1	0.0953112
	NaCl 3h	0.75532	0.0914434			NaCl 3h	2.09744	0.123816			3	0.463414	0.154754			3	0.217697	0.0265239
	6	0.74555	0.138546			6	1.61033	0.0664309			G3	0.218107	0.0195548			G3	0.73282	0.0729621
	NaCl 6h	1.96932	0.297834			NaCl 6h	2.24557	0.191179			6	1.10736	0.564784			6	0.284101	0.0620809
	12	0.461419	0.116244			12	0.999066	0.0469499			G6	1.88146	0.0952185			G6	1.16078	0.0428356
	NaCl 12h	0.951256	0.204354			NaCl 12h	1.16959	0.115637			12	0.904764	0.592717			12	0.279167	0.042346
											G12	0.388621	0.0824177			G12	0.378204	0.00372709
LBO	0	1	0.0365245		LBO	0	1	0.047587		MAX2	0	1	0.036773		MAX2	0	1	0.043292
	3	0.778858	0.0394711			3	0.360186	0.0155756			3	0.987065	0.183427			3	1.87765	0.0527686
	NaCl 3h	0.555624	0.0717503			NaCl 3h	1.05404	0.157012			G3	1.52465	0.175521			G3	2.60034	0.0755001
	6	0.836863	0.2879			6	0.0784509	0.00345329			6	0.74555	0.138546			6	1.61033	0.0664309
	NaCl 6h	1.91952	0.0972778			NaCl 6h	0.824174	0.0387769			G6	2.4933	0.091686			G6	4.84572	0.636969
	12	1.34041	0.223478			12	0.0282569	0.00124383			12	0.461419	0.116244			12	0.999066	0.0469499
	NaCl 12h	1.36935	0.176831			NaCl 12h	0.813996	0.0144355			G12	0.6115	0.0703972			G12	1.8971	0.113398
CCD7	0	1	0.00370414		CCD7	0	1	0.0586631		CCD7	0	1	0.00370414		CCD7	0	1	0.0586631
	3	0.623268	0.219527			3	0.490548	0.322093			3	0.623268	0.219527			3	0.490548	0.322093
	NaCl 3h	1.77637	0.270227			NaCl 3h	0.0822641	0.00656781			G3	0.738617	0.130798			G3	1.13735	0.214624
	6	0.838664	0.0476528			6	0.181571	0.0113716			6	0.838664	0.0476528			6	0.181571	0.0113716
	NaCl 6h	2.95068	0.522521			NaCl 6h	0.263629	0.079764			G6	2.14857	0.0691196			G6	1.54731	0.426568
	12	0.701759	0.0248093			12	0.0235105	0.0104713			12	0.701759	0.0248093			12	0.0235105	0.0104713
	NaCl 12h	0.882024	0.142598			NaCl 12h	0.127547	0.00811303			G12	0.250321	0.0486813			G12	0.51926	0.0339213
